# Supplementary material for: Using Genomics to Measure Phenomics: Repeatability of Bull Prolificacy in Multiple-bull Pastures
Source: Preprints.org preprint supplement (doi:10.20944/preprints202106.0705.v1), 2021-06-29
Supplement: Supplementary file 1 [file Table_S1.xlsx]

## Sheet: Variable names
BULL	ID number
CalfYear	Year calf born, bulls used for breeding one year earlier
BREEDcode	125 = MARC I; 126 = MARC II; 127 = MARC III; 106 = ANGUS
Pasture	Pasture designation A - R
HfrDam	TRUE = bull's dam was a heifer; FALSE = bull's dam was 3-years old or older
BrdYrlng	Bull was used as a yearling before the current CalfN observation as a 2-year old or older
BrdPrior	Bull was used anytime before the current CalfN observation
CalfN	Number of calves in a year and pasture sired by the bull
SqRtN	Square root of CalfN
Bage	Age in years when bull was used for breeding (one year before calves born)
BrAgGT2	Bull was 3-years old or older
WT_DATE	Date bull was weighed before breeding
WEIGHTlb	Bull weight, lb
Weightkg	Bull weight, kg
SC_DATE	Date bull scrotal circumference was measured
SCRCIRC	Scrotal circumference measure, cm

## Sheet: Sire Data
BULL	CalfYear	BREEDcode	Pasture	HfrDam	BrdYrlng	BrdPrior	CalfN	SqRtN	Bage	BrAgGT2	WT_DATE	WEIGHTlb	Weightkg	SC_DATE	SCRCIRC
20095609	2013	125	A	FALSE	YES	YES	28	5.2915	3	YES	2012-04-24	1500	680.389	2012-04-25	37.5
20095685	2013	125	A	FALSE	YES	YES	45	6.7082	3	YES	2012-04-24	1510	684.924	2012-04-25	39.5
20105571	2013	125	A	FALSE	NO	NO	9	3	2	NO	2012-04-24	1360	616.886	2012-04-25	35
20105586	2013	125	A	FALSE	NO	NO	13	3.60555	2	NO	2012-04-24	1520	689.46	2012-04-25	36.5
20105621	2013	125	A	FALSE	NO	NO	2	1.41421	2	NO	2012-04-24	1275	578.33	2012-04-25	38
20105672	2013	125	A	FALSE	NO	NO	19	4.3589	2	NO	2012-04-24	1280	580.598	2012-04-25	34
20105015	2013	126	B	TRUE	YES	YES	24	4.89898	2	NO	2012-04-24	1505	682.657	2012-04-25	38.5
20105070	2013	126	B	FALSE	YES	YES	50	7.07107	2	NO	2012-04-24	1370	621.422	2012-04-25	35.5
20105102	2013	126	B	FALSE	NO	NO	21	4.58258	2	NO	2012-04-24	1460	662.245	2012-04-25	36
20105143	2013	126	B	FALSE	NO	NO	18	4.24264	2	NO	2012-04-24	1410	639.565	2012-04-25	34.5
20105166	2013	126	B	FALSE	NO	NO	0	0	2	NO	2012-04-24	1380	625.957	2012-04-25	40
20104525	2013	127	C	TRUE	NO	NO	15	3.87298	2	NO	2012-04-24	1400	635.029	2012-04-25	34
20104534	2013	127	C	TRUE	NO	NO	14	3.74166	2	NO	2012-04-24	1415	641.833	2012-04-25	38
20104601	2013	127	C	FALSE	NO	NO	38	6.16441	2	NO	2012-04-24	1410	639.565	2012-04-25	37
20104647	2013	127	C	FALSE	YES	YES	42	6.48074	2	NO	2012-04-24	1430	648.637	2012-04-25	37
20104653	2013	127	C	FALSE	NO	NO	5	2.23607	2	NO	2012-04-24	1320	598.742	2012-04-25	39.5
20104684	2013	127	C	FALSE	NO	NO	6	2.44949	2	NO	2012-04-24	1375	623.69	2012-04-25	39.5
20088098	2013	106	D	FALSE	YES	YES	39	6.245	4	YES	2012-04-24	1630	739.356	2012-04-25	41
20098071	2013	106	D	FALSE	YES	YES	13	3.60555	3	YES	2012-04-24	1540	698.532	2012-04-25	41
20108035	2013	106	D	TRUE	YES	YES	37	6.08276	2	NO	2012-04-24	1440	653.173	2012-04-25	39
20108038	2013	106	D	FALSE	YES	YES	16	4	2	NO	2012-04-24	1615	732.552	2012-04-25	41.5
20108045	2013	106	D	TRUE	NO	NO	10	3.16228	2	NO	2012-04-24	1335	605.546	2012-04-25	38
20108098	2013	106	D	FALSE	NO	NO	23	4.79583	2	NO	2012-04-24	1340	607.814	2012-04-25	39
20108105	2013	106	D	FALSE	NO	NO	31	5.56776	2	NO	2012-04-24	1535	696.264	2012-04-25	40
20108114	2013	106	D	FALSE	NO	NO	18	4.24264	2	NO	2012-04-24	1370	621.422	2012-04-25	39.5
20108150	2013	106	D	FALSE	NO	NO	32	5.65685	2	NO	2012-04-24	1555	705.336	2012-04-25	40
20108203	2013	106	D	FALSE	NO	NO	8	2.82843	2	NO	2012-04-24	1455	659.977	2012-04-25	37.5
20085638	2014	125	E	FALSE	NO	YES	16	4	5	YES	2013-04-30	1795	814.198	2013-04-30	42
20105571	2014	125	E	FALSE	NO	YES	15	3.87298	3	YES	2013-04-30	1495	678.121	2013-04-30	36
20105578	2014	125	E	FALSE	NO	NO	25	5	3	YES	2013-04-30	1600	725.748	2013-04-30	42
20105586	2014	125	E	FALSE	NO	YES	44	6.63325	3	YES	2013-04-30	1765	800.591	2013-04-30	36.5
20105621	2014	125	E	FALSE	NO	YES	5	2.23607	3	YES	2013-04-30	1390	630.493	2013-04-30	39
20115572	2014	125	E	FALSE	NO	NO	38	6.16441	2	NO	2013-05-02	1355	614.618	2013-05-02	37
20105672	2014	125	F	FALSE	NO	YES	11	3.31662	3	YES	2013-04-28	1425	646.369	2013-04-28	35
20115652	2014	125	F	FALSE	NO	NO	20	4.47214	2	NO	2013-05-02	1660	752.963	2013-05-02	38
20085105	2014	126	G	FALSE	YES	YES	14	3.74166	5	YES	2013-04-30	2235	1013.78	2013-04-30	40
20095075	2014	126	G	TRUE	YES	YES	17	4.12311	4	YES	2013-04-30	1685	764.303	2013-04-30	38.5
20105015	2014	126	G	TRUE	YES	YES	23	4.79583	3	YES	2013-04-30	1585	718.944	2013-04-30	40
20105070	2014	126	G	FALSE	YES	YES	41	6.40312	3	YES	2013-04-30	1470	666.781	2013-04-30	37
20105143	2014	126	G	FALSE	NO	YES	13	3.60555	3	YES	2013-04-30	1620	734.82	2013-04-30	37
20115044	2014	126	G	TRUE	NO	NO	16	4	2	NO	2013-05-02	1228	557.011	2013-05-02	40
20115059	2014	126	G	FALSE	NO	NO	2	1.41421	2	NO	2013-05-02	1480	671.317	2013-05-02	38.5
20115078	2014	126	G	FALSE	NO	NO	32	5.65685	2	NO	2013-05-01	1400	635.029	2013-05-01	34
20115153	2014	126	G	FALSE	NO	NO	20	4.47214	2	NO	2013-05-01	1300	589.67	2013-05-01	36
20074674	2014	127	H	FALSE	NO	YES	0	0	6	YES	2013-04-30	1900	861.826	2013-04-30	39
20094534	2014	127	H	FALSE	YES	YES	6	2.44949	4	YES	2013-04-30	1830	830.074	2013-04-30	37
20104525	2014	127	H	TRUE	NO	YES	18	4.24264	3	YES	2013-04-30	1680	762.035	2013-04-30	36
20104534	2014	127	H	TRUE	NO	YES	15	3.87298	3	YES	2013-04-30	1485	673.585	2013-04-30	38
20104563	2014	127	H	FALSE	YES	YES	28	5.2915	3	YES	2013-04-30	1560	707.604	2013-04-30	36
20104647	2014	127	H	FALSE	YES	YES	55	7.4162	3	YES	2013-04-30	1460	662.245	2013-04-30	37
20104653	2014	127	H	FALSE	NO	YES	29	5.38516	3	YES	2013-04-30	1395	632.761	2013-04-30	38.5
20104684	2014	127	H	FALSE	NO	YES	11	3.31662	3	YES	2013-04-30	1555	705.336	2013-04-30	41
20114578	2014	127	H	FALSE	NO	NO	2	1.41421	2	NO	2013-05-02	1226	556.104	2013-05-02	37.5
20088098	2014	106	I	FALSE	YES	YES	57	7.54983	5	YES	2013-04-30	1660	752.963	2013-04-30	38
20098062	2014	106	I	FALSE	NO	YES	17	4.12311	4	YES	2013-04-30	1840	834.61	2013-04-30	42.5
20098071	2014	106	I	FALSE	YES	YES	15	3.87298	4	YES	2013-04-30	1835	832.342	2013-04-30	39
20098112	2014	106	I	FALSE	YES	YES	4	2	4	YES	2013-04-30	1765	800.591	2013-04-30	39
20108038	2014	106	I	FALSE	YES	YES	37	6.08276	3	YES	2013-04-30	1680	762.035	2013-04-30	44
20108114	2014	106	I	FALSE	NO	YES	23	4.79583	3	YES	2013-04-30	1625	737.088	2013-04-30	41.5
20108150	2014	106	I	FALSE	NO	YES	15	3.87298	3	YES	2013-04-30	1780	807.394	2013-04-30	38
20108203	2014	106	I	FALSE	NO	YES	3	1.73205	3	YES	2013-04-30	1685	764.303	2013-04-30	37
20118091	2014	106	I	FALSE	NO	NO	2	1.41421	2	NO	2013-05-02	1335	605.546	2013-05-02	36
20118095	2014	106	I	FALSE	NO	NO	39	6.245	2	NO	2013-05-02	1360	616.886	2013-05-02	36
20118162	2014	106	I	FALSE	NO	NO	13	3.60555	2	NO	2013-05-02	1365	619.154	2013-05-02	40
20105551	2015	125	J	FALSE	NO	YES	5	2.23607	4	YES	2014-04-28	1750	793.787	2014-04-28	38
20105571	2015	125	J	FALSE	NO	YES	18	4.24264	4	YES	2014-04-28	1810	821.002	2014-04-28	38
20105578	2015	125	J	FALSE	NO	YES	31	5.56776	4	YES	2014-04-28	1670	757.499	2014-04-28	39.5
20105621	2015	125	J	FALSE	NO	YES	8	2.82843	4	YES	2014-04-28	1645	746.159	2014-04-28	42
20115529	2015	125	J	TRUE	YES	YES	21	4.58258	3	YES	2014-04-28	1545	700.8	2014-04-28	37
20115572	2015	125	J	FALSE	NO	YES	24	4.89898	3	YES	2014-04-28	1585	718.944	2014-04-28	38.5
20115640	2015	125	J	FALSE	NO	YES	18	4.24264	3	YES	2014-04-28	1575	714.408	2014-04-28	39
20115652	2015	125	J	FALSE	NO	YES	52	7.2111	3	YES	2014-04-28	1680	762.035	2014-04-28	36.5
20115690	2015	125	J	FALSE	YES	YES	2	1.41421	3	YES	2014-04-28	1605	728.016	2014-04-28	39.5
20105015	2015	126	K	TRUE	YES	YES	48	6.9282	4	YES	2014-04-28	1760	798.323	2014-04-28	39.5
20115051	2015	126	K	FALSE	YES	YES	18	4.24264	3	YES	2014-04-28	1465	664.513	2014-04-28	39
20115059	2015	126	K	FALSE	NO	YES	5	2.23607	3	YES	2014-04-28	1675	759.767	2014-04-28	42
20115078	2015	126	K	FALSE	NO	YES	28	5.2915	3	YES	2014-04-28	1605	728.016	2014-04-28	35.5
20115096	2015	126	K	FALSE	NO	YES	6	2.44949	3	YES	2014-04-28	1595	723.48	2014-04-28	38.5
20115149	2015	126	K	FALSE	NO	NO	11	3.31662	3	YES	2014-04-28	1625	737.088	2014-04-28	37.5
20115153	2015	126	K	FALSE	NO	YES	29	5.38516	3	YES	2014-04-28	1530	693.996	2014-04-28	37.5
20104525	2015	127	L	TRUE	NO	YES	22	4.69042	4	YES	2014-04-28	1820	825.538	2014-04-28	36.5
20104534	2015	127	L	TRUE	NO	YES	17	4.12311	4	YES	2014-04-28	1705	773.375	2014-04-28	40
20104563	2015	127	L	FALSE	YES	YES	32	5.65685	4	YES	2014-04-28	1645	746.159	2014-04-28	37.5
20104653	2015	127	L	FALSE	NO	YES	19	4.3589	4	YES	2014-04-28	1640	743.891	2014-04-28	39.5
20104684	2015	127	L	FALSE	NO	YES	9	3	4	YES	2014-04-28	1755	796.055	2014-04-28	41
20114509	2015	127	L	TRUE	YES	YES	17	4.12311	3	YES	2014-04-28	1535	696.264	2014-04-28	42
20114536	2015	127	L	FALSE	YES	YES	19	4.3589	3	YES	2014-04-28	1440	653.173	2014-04-28	39
20114578	2015	127	L	FALSE	NO	YES	4	2	3	YES	2014-04-28	1410	639.565	2014-04-28	40.5
20114595	2015	127	L	FALSE	YES	YES	14	3.74166	3	YES	2014-04-28	1445	655.441	2014-04-28	42
20114649	2015	127	L	FALSE	NO	YES	40	6.32456	3	YES	2014-04-28	1615	732.552	2014-04-28	38.5
20114713	2015	127	L	FALSE	NO	YES	1	1	3	YES	2014-04-28	1380	625.957	2014-04-28	39
20098062	2015	106	M	FALSE	NO	YES	23	4.79583	5	YES	2014-04-28	1845	836.878	2014-04-28	43
20098071	2015	106	M	FALSE	YES	YES	11	3.31662	5	YES	2014-04-28	1970	893.577	2014-04-28	40.5
20108038	2015	106	M	FALSE	YES	YES	14	3.74166	4	YES	2014-04-28	1920	870.897	2014-04-28	43
20108045	2015	106	M	TRUE	NO	YES	9	3	4	YES	2014-04-28	1670	757.499	2014-04-28	40.5
20108114	2015	106	M	FALSE	NO	YES	24	4.89898	4	YES	2014-04-28	1870	848.218	2014-04-28	42.5
20108150	2015	106	M	FALSE	NO	YES	1	1	4	YES	2014-04-28	1925	873.165	2014-04-28	41.5
20118026	2015	106	M	TRUE	NO	YES	14	3.74166	3	YES	2014-04-28	1490	675.853	2014-04-28	36.5
20118068	2015	106	M	FALSE	NO	NO	19	4.3589	3	YES	2014-04-28	1475	669.049	2014-04-28	40.5
20118095	2015	106	M	FALSE	NO	YES	41	6.40312	3	YES	2014-04-28	1540	698.532	2014-04-28	36.5
20118162	2015	106	M	FALSE	NO	YES	46	6.78233	3	YES	2014-04-28	1485	673.585	2014-04-28	41
20105551	2016	125	N	FALSE	NO	YES	12	3.4641	5	YES	2015-04-28	2005	909.453	2015-04-28	39
20105578	2016	125	N	FALSE	NO	YES	37	6.08276	5	YES	2015-04-28	1905	864.093	2015-04-28	39.5
20115529	2016	125	N	TRUE	YES	YES	20	4.47214	4	YES	2015-04-28	1840	834.61	2015-04-28	37
20115640	2016	125	N	FALSE	NO	YES	24	4.89898	4	YES	2015-04-28	1860	843.682	2015-04-28	40
20115690	2016	125	N	FALSE	YES	YES	9	3	4	YES	2015-04-28	1970	893.577	2015-04-28	41.5
20135513	2016	125	N	TRUE	NO	NO	36	6	2	NO	2015-04-29	1515	687.192	2015-04-29	34.5
20135541	2016	125	N	FALSE	YES	YES	21	4.58258	2	NO	2015-04-29	1605	728.016	2015-04-29	40
20135556	2016	125	N	FALSE	YES	YES	16	4	2	NO	2015-04-29	1410	639.565	2015-04-29	35.5
20135561	2016	125	N	FALSE	YES	YES	14	3.74166	2	NO	2015-04-29	1490	675.853	2015-04-29	35.5
20115051	2016	126	O	FALSE	YES	YES	22	4.69042	4	YES	2015-04-28	1890	857.29	2015-04-28	39.5
20115059	2016	126	O	FALSE	NO	YES	18	4.24264	4	YES	2015-04-28	2120	961.616	2015-04-28	42
20115096	2016	126	O	FALSE	NO	YES	10	3.16228	4	YES	2015-04-28	1900	861.826	2015-04-28	41.5
20115149	2016	126	O	FALSE	NO	YES	16	4	4	YES	2015-04-28	1900	861.826	2015-04-28	37.5
20135032	2016	126	O	FALSE	NO	NO	19	4.3589	2	NO	2015-04-29	1645	746.159	2015-04-29	40.5
20135047	2016	126	O	FALSE	NO	NO	29	5.38516	2	NO	2015-04-29	1635	741.624	2015-04-29	38
20135057	2016	126	O	FALSE	NO	NO	14	3.74166	2	NO	2015-04-29	1755	796.055	2015-04-29	42
20135072	2016	126	O	FALSE	NO	NO	19	4.3589	2	NO	2015-04-29	1645	746.159	2015-04-29	38
20135114	2016	126	O	FALSE	NO	NO	18	4.24264	2	NO	2015-04-29	1685	764.303	2015-04-29	42
20114578	2016	127	P	FALSE	NO	YES	10	3.16228	4	YES	2015-04-28	1695	768.839	2015-04-28	42
20114595	2016	127	P	FALSE	YES	YES	8	2.82843	4	YES	2015-04-28	1755	796.055	2015-04-28	45
20114649	2016	127	P	FALSE	NO	YES	33	5.74456	4	YES	2015-04-28	1820	825.538	2015-04-28	41
20114713	2016	127	P	FALSE	NO	YES	10	3.16228	4	YES	2015-04-28	1775	805.126	2015-04-28	40
20134504	2016	127	P	TRUE	YES	YES	13	3.60555	2	NO	2015-04-29	1580	716.676	2015-04-29	38.5
20134529	2016	127	P	TRUE	YES	YES	35	5.91608	2	NO	2015-04-29	1535	696.264	2015-04-29	37
20104653	2016	127	Q	FALSE	NO	YES	15	3.87298	5	YES	2015-04-28	1975	895.845	2015-04-28	42
20114509	2016	127	Q	TRUE	YES	YES	26	5.09902	4	YES	2015-04-28	1745	791.519	2015-04-28	44.5
20134516	2016	127	Q	TRUE	NO	NO	11	3.31662	2	NO	2015-04-29	1600	725.748	2015-04-29	38.5
20134560	2016	127	Q	FALSE	NO	NO	16	4	2	NO	2015-04-29	1670	757.499	2015-04-29	35
20134596	2016	127	Q	FALSE	NO	NO	22	4.69042	2	NO	2015-04-29	1640	743.891	2015-04-29	38
20098071	2016	106	R	FALSE	YES	YES	15	3.87298	6	YES	2015-04-28	2269	1029.2	2015-04-28	42
20108038	2016	106	R	FALSE	YES	YES	38	6.16441	5	YES	2015-04-28	2190	993.367	2015-04-28	44.5
20108045	2016	106	R	TRUE	NO	YES	26	5.09902	5	YES	2015-04-28	1840	834.61	2015-04-28	40.5
20108114	2016	106	R	FALSE	NO	YES	10	3.16228	5	YES	2015-04-28	2295	1040.99	2015-04-28	44
20108150	2016	106	R	FALSE	NO	YES	0	0	5	YES	2015-04-28	2255	1022.85	2015-04-28	42
20118026	2016	106	R	TRUE	NO	YES	16	4	4	YES	2015-04-28	1875	850.486	2015-04-28	37.5
20118095	2016	106	R	FALSE	NO	YES	34	5.83095	4	YES	2015-04-28	1960	889.041	2015-04-28	36.5
20118162	2016	106	R	FALSE	NO	YES	26	5.09902	4	YES	2015-04-28	1910	866.361	2015-04-28	43
20138085	2016	106	R	FALSE	NO	NO	13	3.60555	2	NO	2015-04-29	1825	827.806	2015-04-29	42
20138192	2016	106	R	FALSE	NO	NO	30	5.47723	2	NO	2015-04-29	1665	755.231	2015-04-29	40
20138262	2016	106	R	FALSE	YES	YES	5	2.23607	2	NO	2015-04-29	1615	732.552	2015-04-29	38.5
